# Supplementary material for: Self-assembly of mucoadhesive nanofibers
Source: Royal Society of Chemistry journal article supplement (doi:10.1039/c4ra09329a), 2014-01-01
Supplement: c4ra09329a1.pdf [file c4ra09329a1.pdf]

## Supporting Online Material for

Self-assembly Mucoadhesive Nanofibers

P. Suvannasara<sup>a</sup>, N. Praphairaksit<sup>b</sup>, N. Muangsin<sup>\*c</sup>

<sup>a</sup>Program of Petrochemistry, Faculty of Science, Chulalongkorn University, Bangkok, 10330, Thailand

<sup>b</sup>Department of Biology, Faculty of Science, Srinakarinwirot University, Bangkok, 10110, Thailand

<sup>c</sup>Bioorganic Chemistry and Biomaterials Research group, Department of Chemistry, Faculty of Science, Chulalongkorn University, Bangkok, 10330, Thailand

\* To whom correspondences should be addressed: [nongnuj.j@chula.ac.th](mailto:nongnuj.j@chula.ac.th)

**Contents**

|                                                                                         |    |
|-----------------------------------------------------------------------------------------|----|
| Fig. S1 Reaction scheme for the covalent attachment of SA and 4-CBS to TMC.             | S3 |
| Fig. S2 <sup>1</sup> H NMR spectra of the (a) chitosan, (b) TMC and (c) 4-CBS-TMC       | S4 |
| Fig. S3 FT-IR spectra of the (a) chitosan, (b) TMC, (c) 4-CBS-TMC and (d) SA-4-CBS-TMC. | S5 |
| Fig. S4 XRD pattern of (a) chitosan, (b) 4-CBS-TMC and (c) SA-4-CBS-TMC.                | S6 |
| Fig. S5 TGA thermogram of (a) chitosan, (b) TMC, (c) 4-CBS-TMC and (d) SA-4-CBS-TMC.    | S7 |
| Fig. S6 The morphology of SA-4-CBS-TMC at the high concentration (13.33 mg/mL).         | S8 |

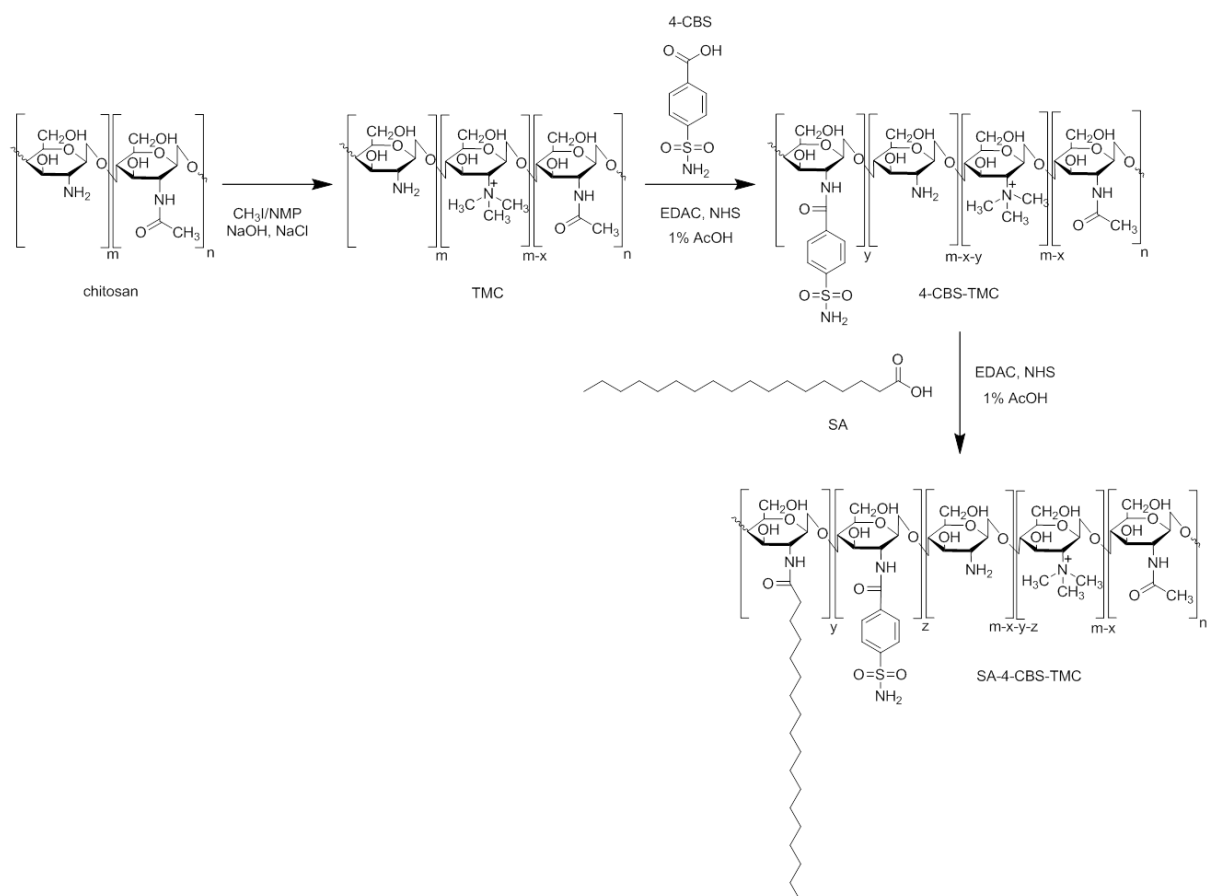

**Fig. S1** Reaction scheme for the covalent attachment of SA and 4-CBS to TMC.

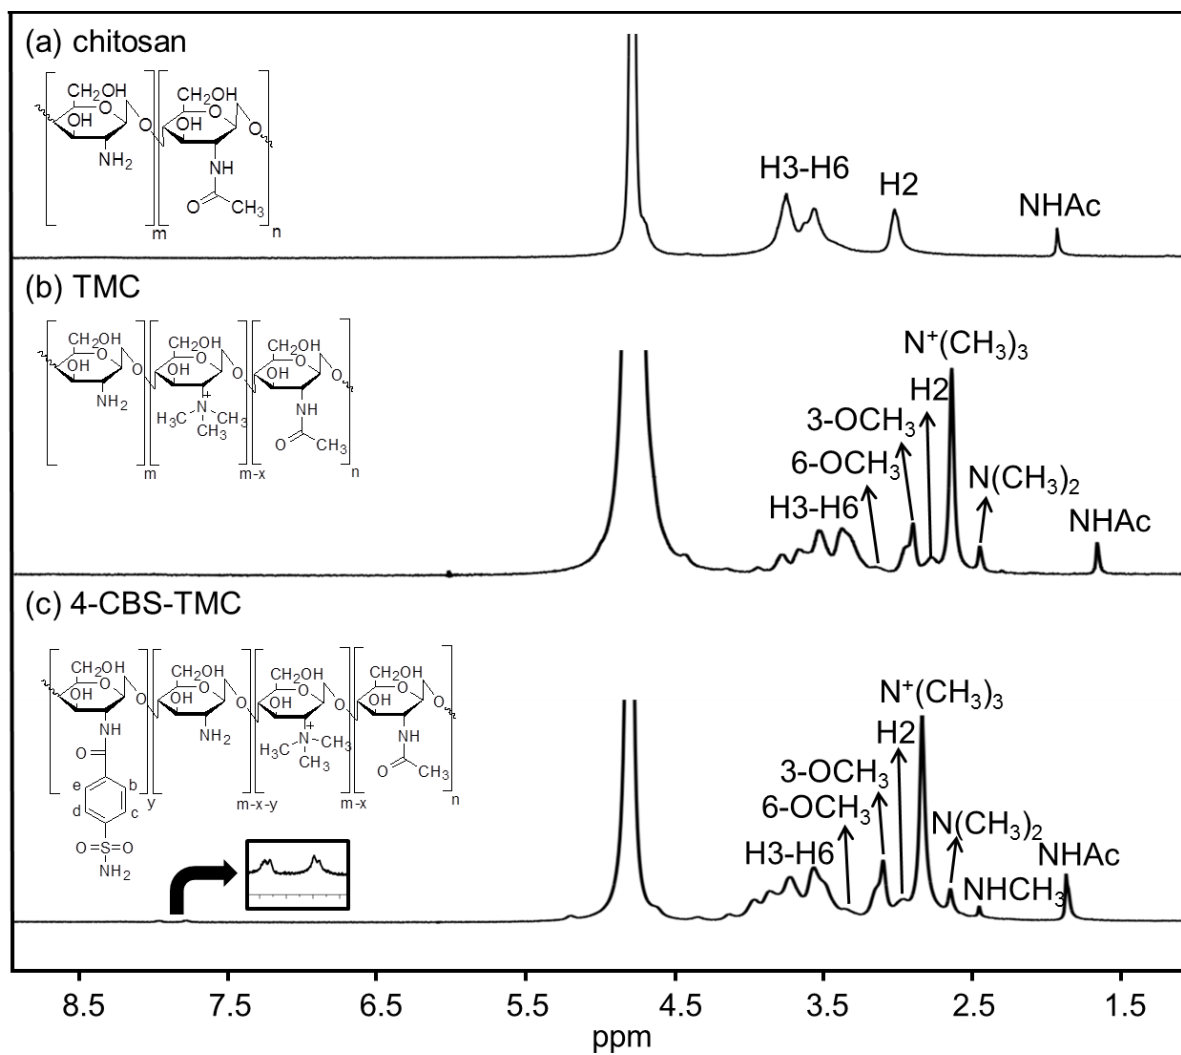

**Fig. S2**  $^1\text{H}$  NMR spectra of the (a) chitosan, (b) TMC and (c) 4-CBS-TMC.

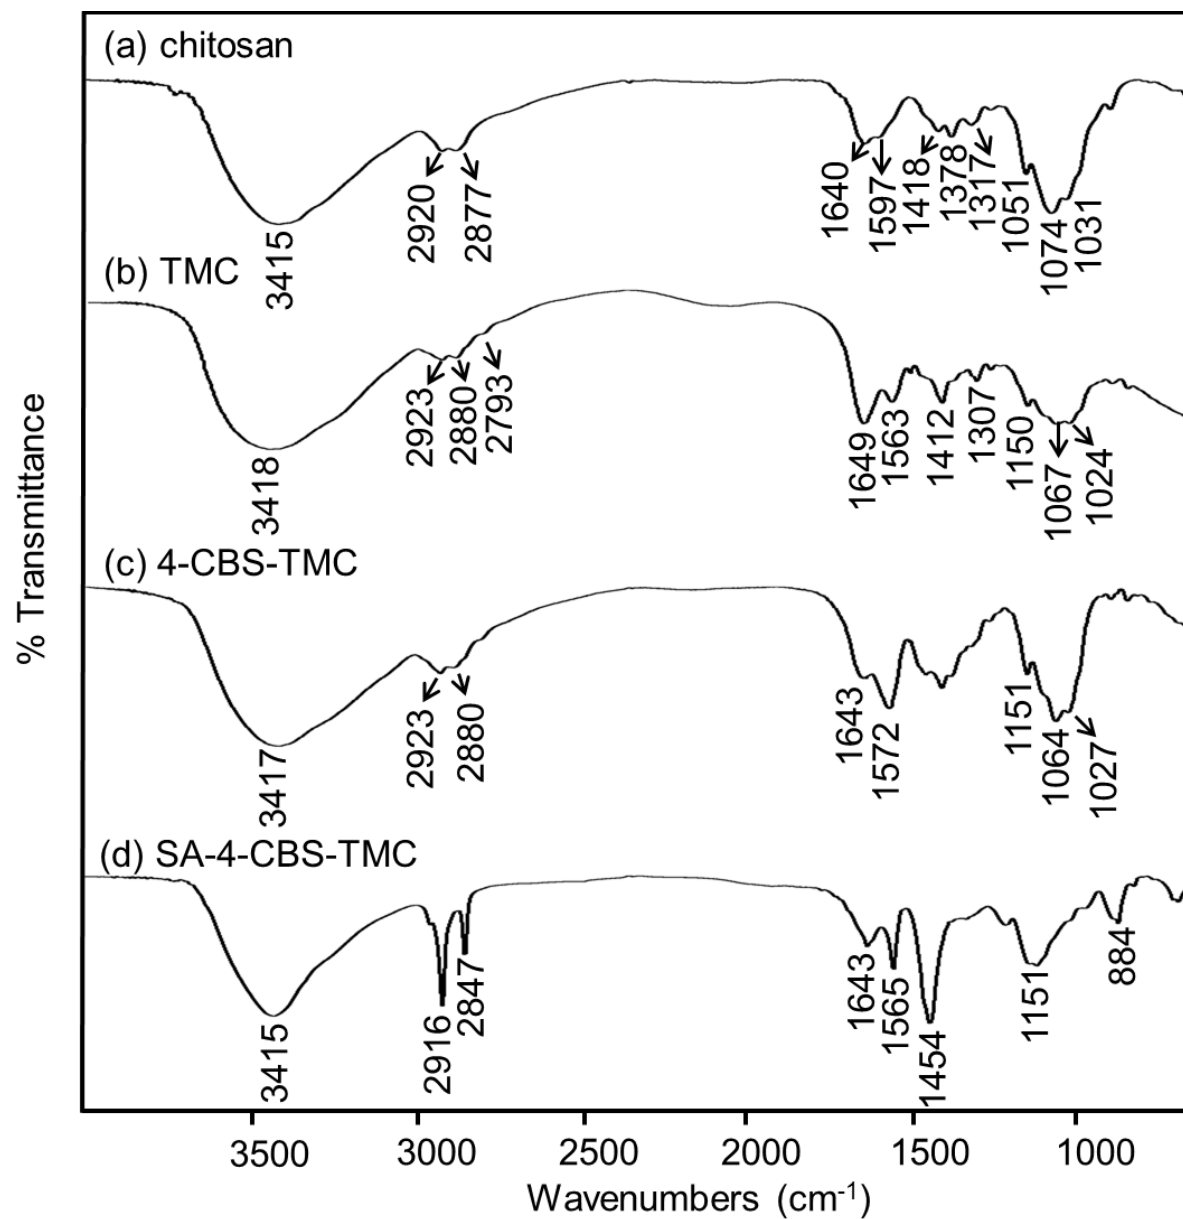

**Fig. S3** FT-IR spectra of the (a) chitosan, (b) TMC, (c) 4-CBS-TMC and (d) SA-4-CBS-TMC.

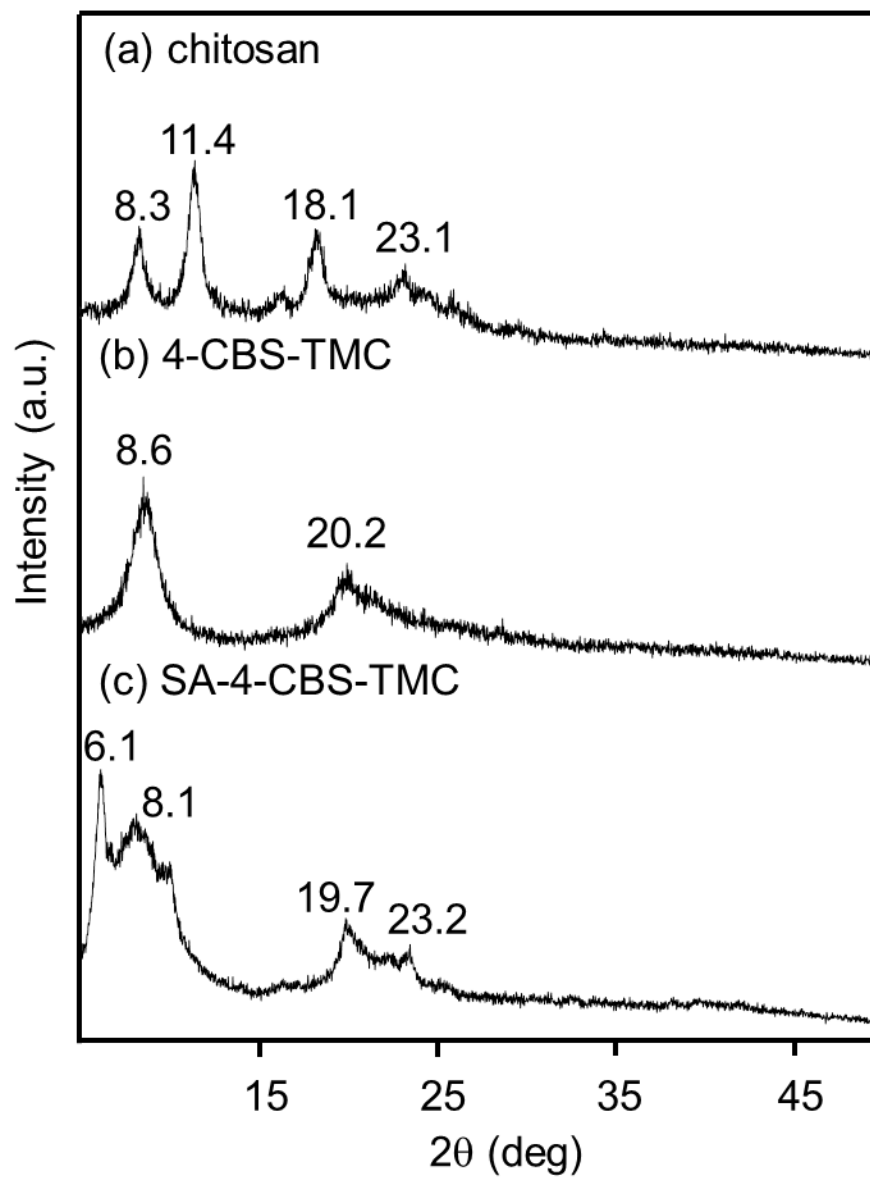

**Fig. S4** XRD pattern of (a) chitosan, (b) 4-CBS-TMC and (c) SA-4-CBS-TMC.

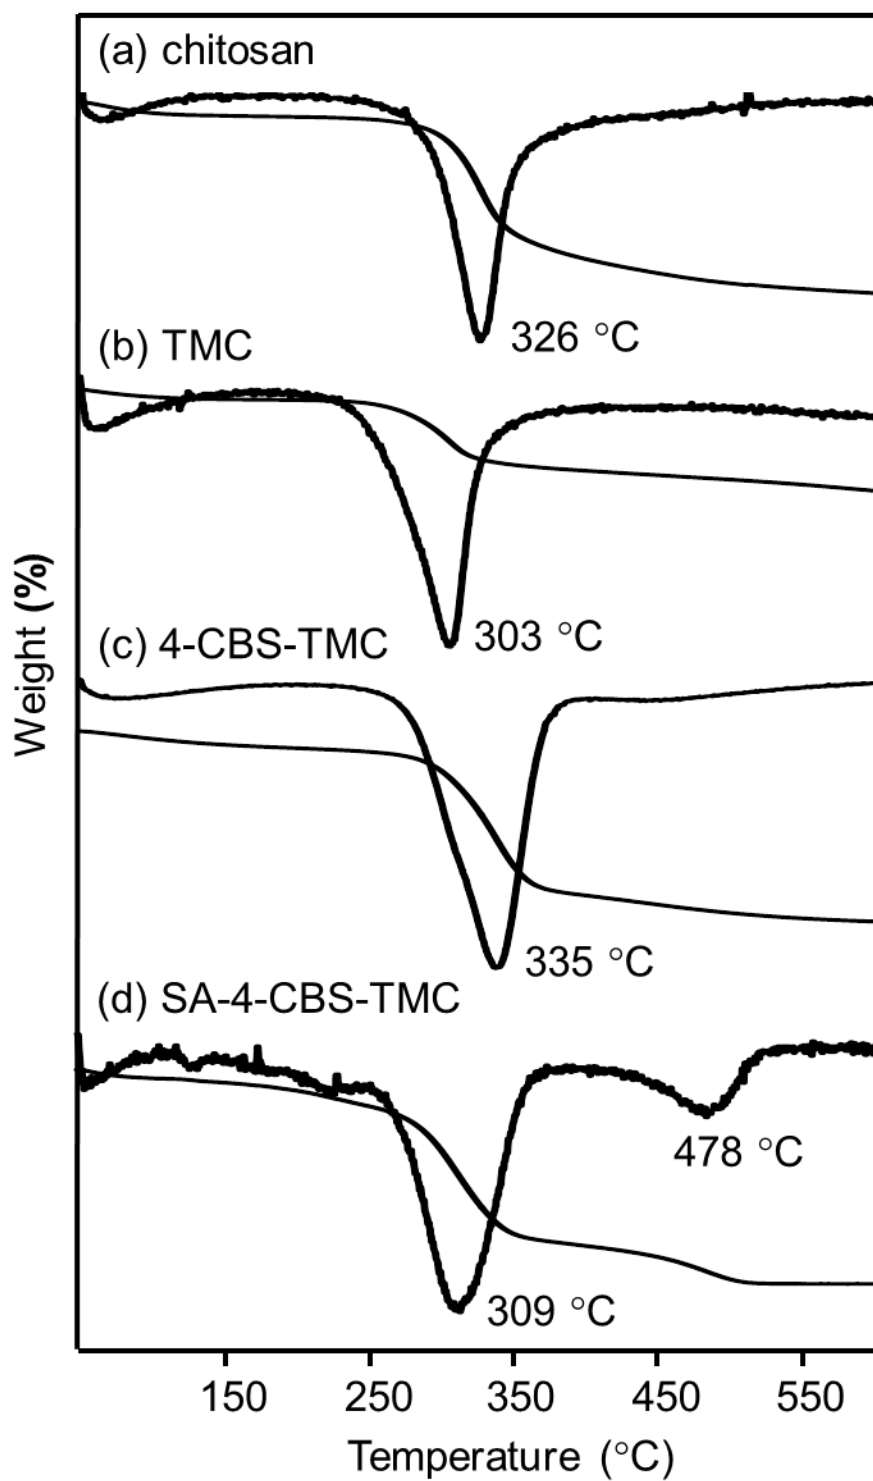

**Fig. S5** TGA thermogram of (a) chitosan, (b) TMC, (c) 4-CBS-TMC and (d) SA-4-CBS-TMC.

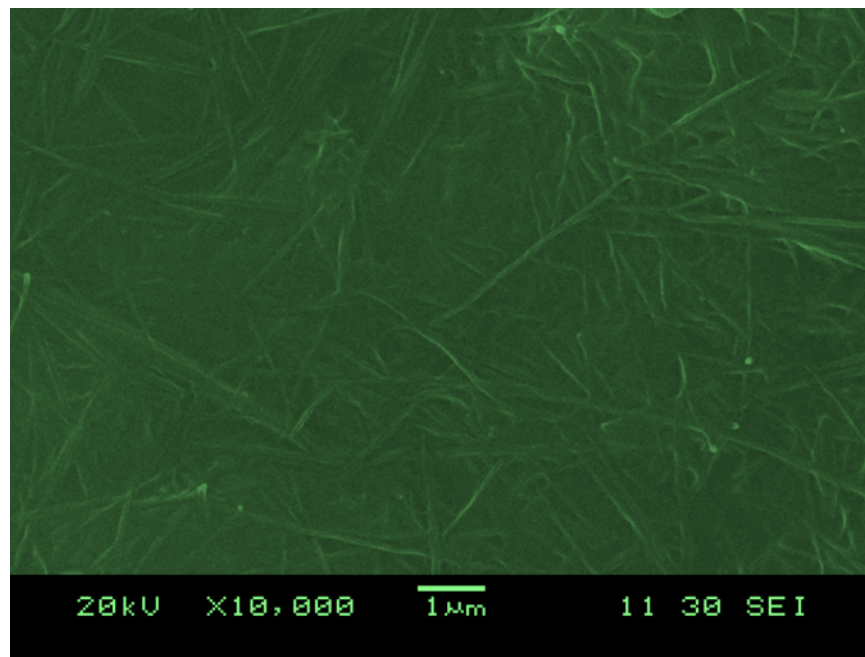

**Figure S6.** The morphology of SA-4-CBS-TMC at the high concentration (13.33 mg/mL).
